# Supplementary material
Source: PubMed Central journal article supplement (PMC3512155)
Supplement: supp_112.144790_FigureS1.pdf [file supp_112.144790_FigureS1.pdf]

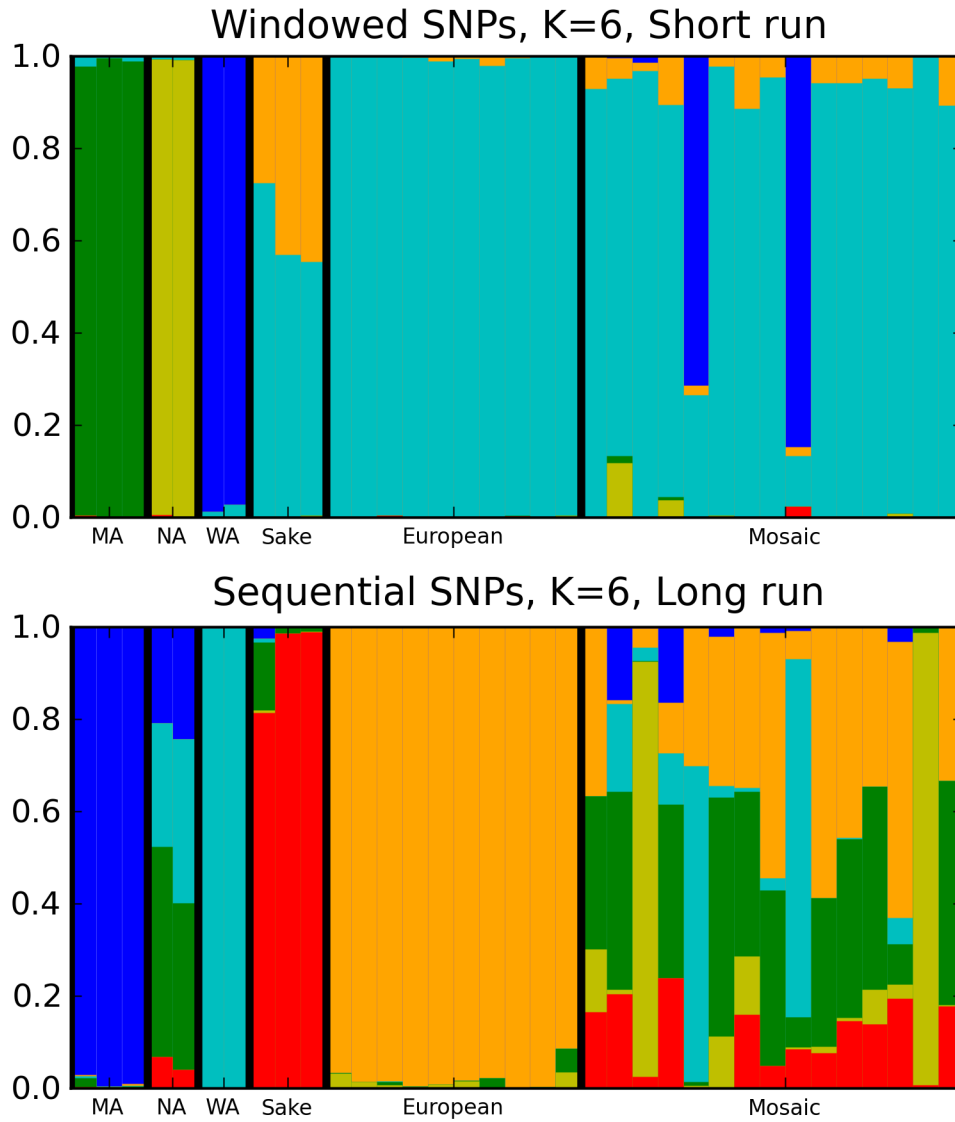

**Figure S1** This figure shows a comparison of representative runs of the program, STRUCTURE, using SNPs selected according to the windowed (top) and sequential (bottom) methods. Although some populations, such as the Malaysian (MA) and West African (WA) strains, separate well in both cases, the European and mosaic strains are effectively indistinguishable when using the windowed SNPs.
