# Supplementary material
Source: PubMed Central journal article supplement (PMC3512155)
Supplement: supp_112.144790_FigureS2.pdf [file supp_112.144790_FigureS2.pdf]

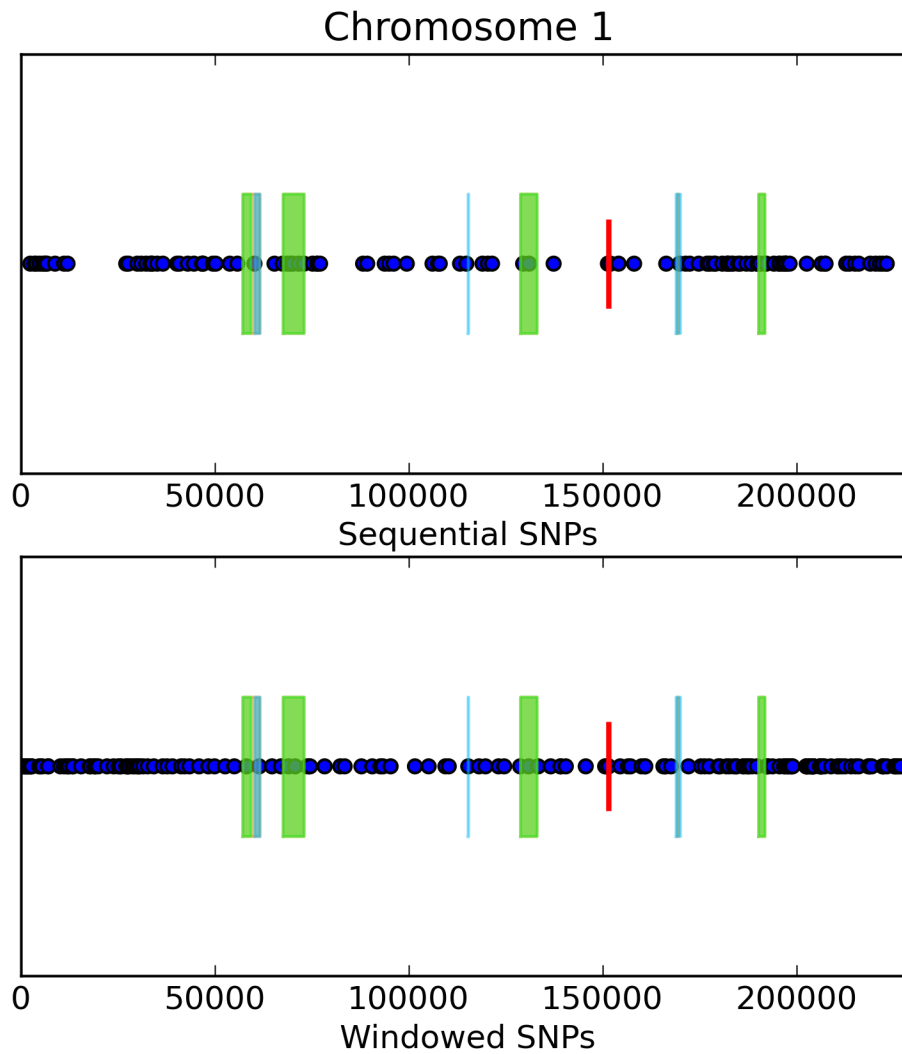

**Figure S2** This figure shows that SNPs selected by the windowing method (bottom) tend to be more uniform across the genome whereas SNPs selected by the sequential method (top) tend to follow the recombination landscape of the genome more closely. Red lines represent centromere position, bright green rectangles represent crossover recombination hotspots, cyan rectangles represent non-crossover recombination hotspots, and orange represents overall recombination hotspots.
