# Supplementary material
Source: PubMed Central journal article supplement (PMC3512155)
Supplement: supp_112.144790_FigureS3.pdf [file supp_112.144790_FigureS3.pdf]

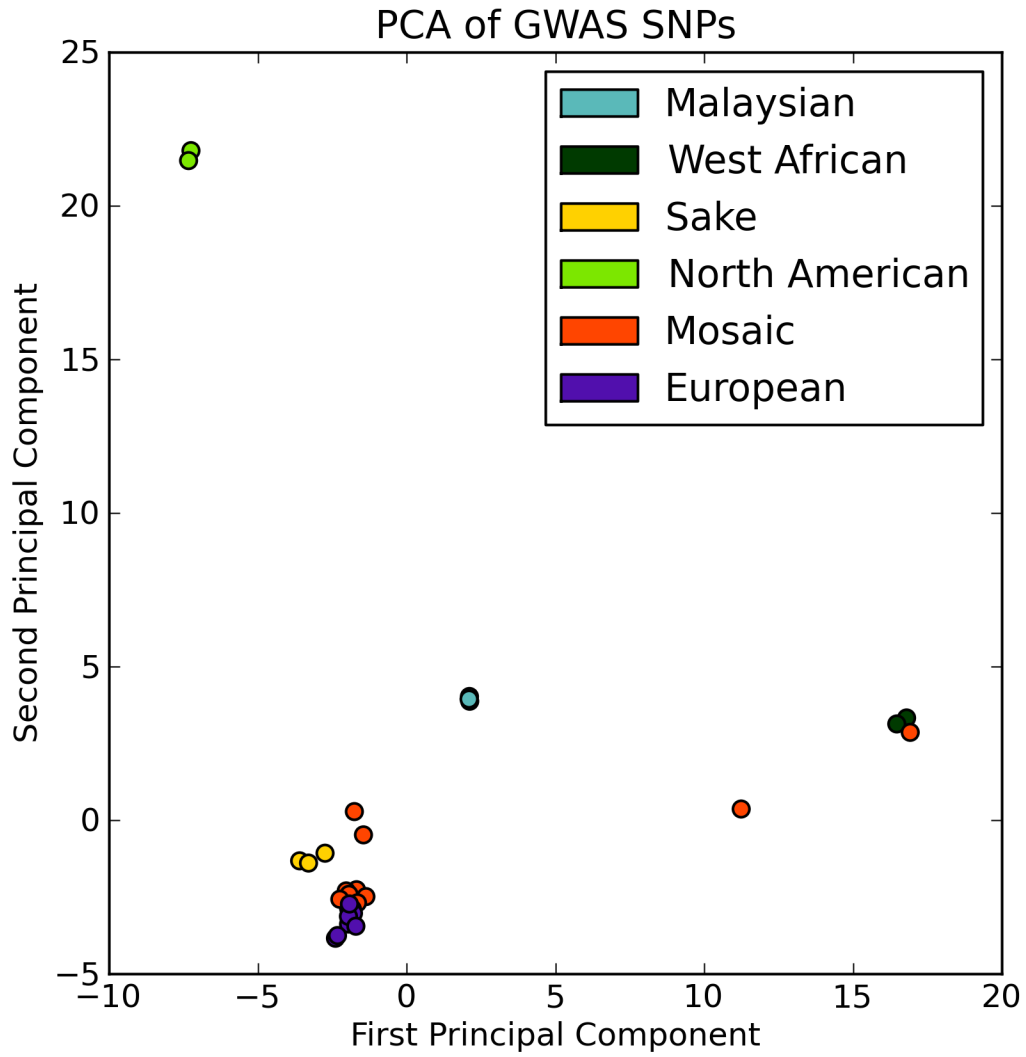

**Figure S3** Each *S. cerevisiae* strain is plotted on the first two principal components, after performing principal components analysis on the genotype matrix.
