# Supplementary material
Source: PubMed Central journal article supplement (PMC3512155)
Supplement: supp_112.144790_FigureS6.pdf [file supp_112.144790_FigureS6.pdf]

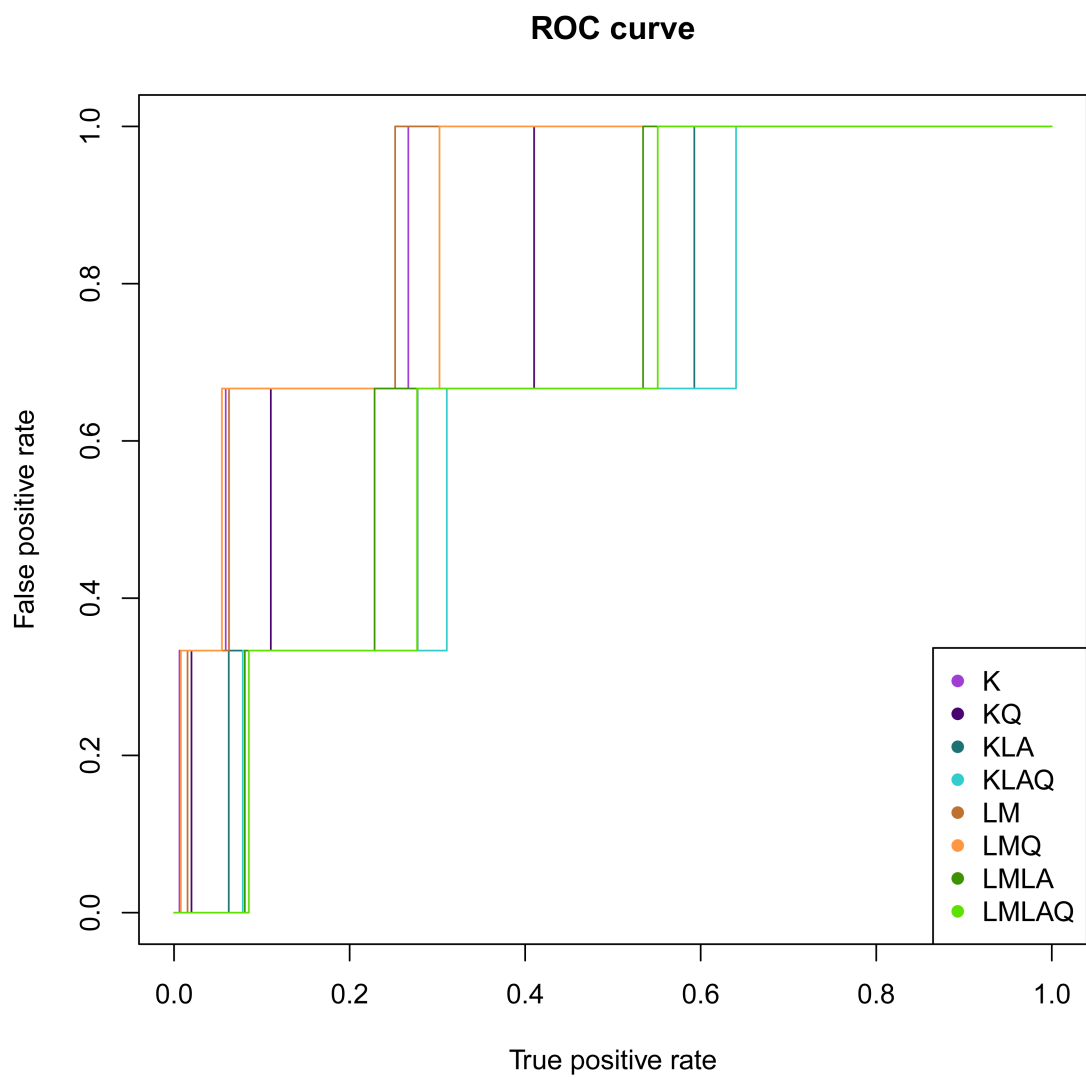

**Figure S6** ROC curve of simulations with 3 causal SNPs, each adding phenotypic value 10, with a base phenotypic value given by one trait from (WARRINGER *et al.* 2011).
