# Supplementary material
Source: PubMed Central journal article supplement (PMC3512155)
Supplement: supp_112.144790_TableS1.pdf [file supp_112.144790_TableS1.pdf]

**Table S1** This table gives summary statistics of the mean squared distance (MSDs) of all GWAS methods used over all phenotypes. This data is also shown in Figure 2.

|            | Mean   | Median  | Std dev |
|------------|--------|---------|---------|
| R-LM       | 0.010  | 0.0060  | 0.012   |
| R-Q        | 0.0040 | 0.0016  | 0.0063  |
| EMMAX-K    | 0.0028 | 0.0017  | 0.0032  |
| EMMAX-QK   | 0.0073 | 0.0040  | 0.0088  |
| R-LA       | 0.0065 | 0.0024  | 0.0100  |
| R-LAQ      | 0.0036 | 0.0014  | 0.0058  |
| EMMAX-KLA  | 0.0031 | 0.00095 | 0.0067  |
| EMMAX-KLAQ | 0.015  | 0.010   | 0.014   |
| TASSEL-K   | 0.0038 | 0.0027  | 0.0035  |
| TASSEL-QK  | 0.0050 | 0.0024  | 0.0076  |
