# Supplementary material
Source: PubMed Central journal article supplement (PMC3512155)

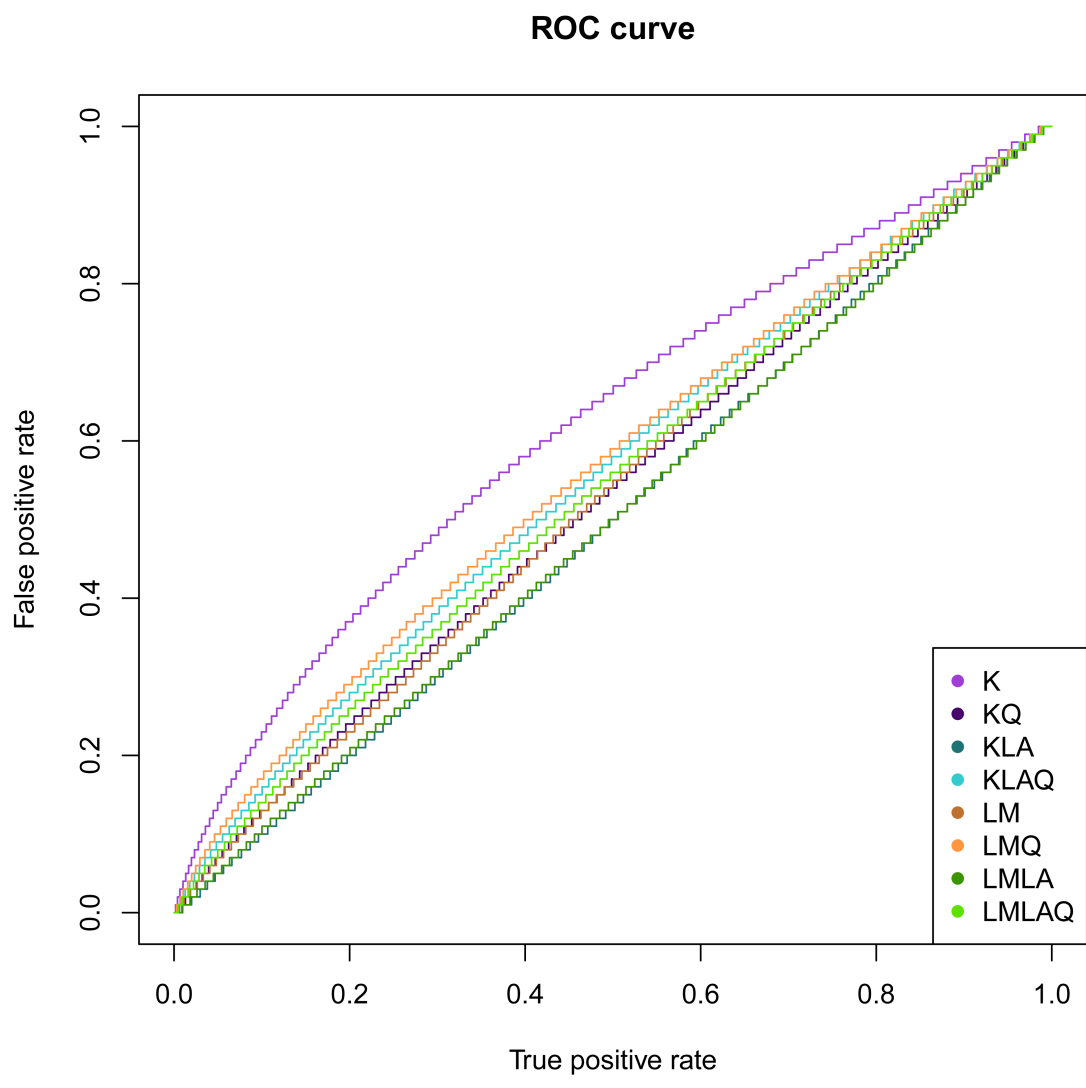

**Figure S4** ROC curve of simulations with 100 causal SNPs each adding phenotypic value 1.

Supplement: supp_112.144790_FigureS4.pdf [file supp_112.144790_FigureS4.pdf]

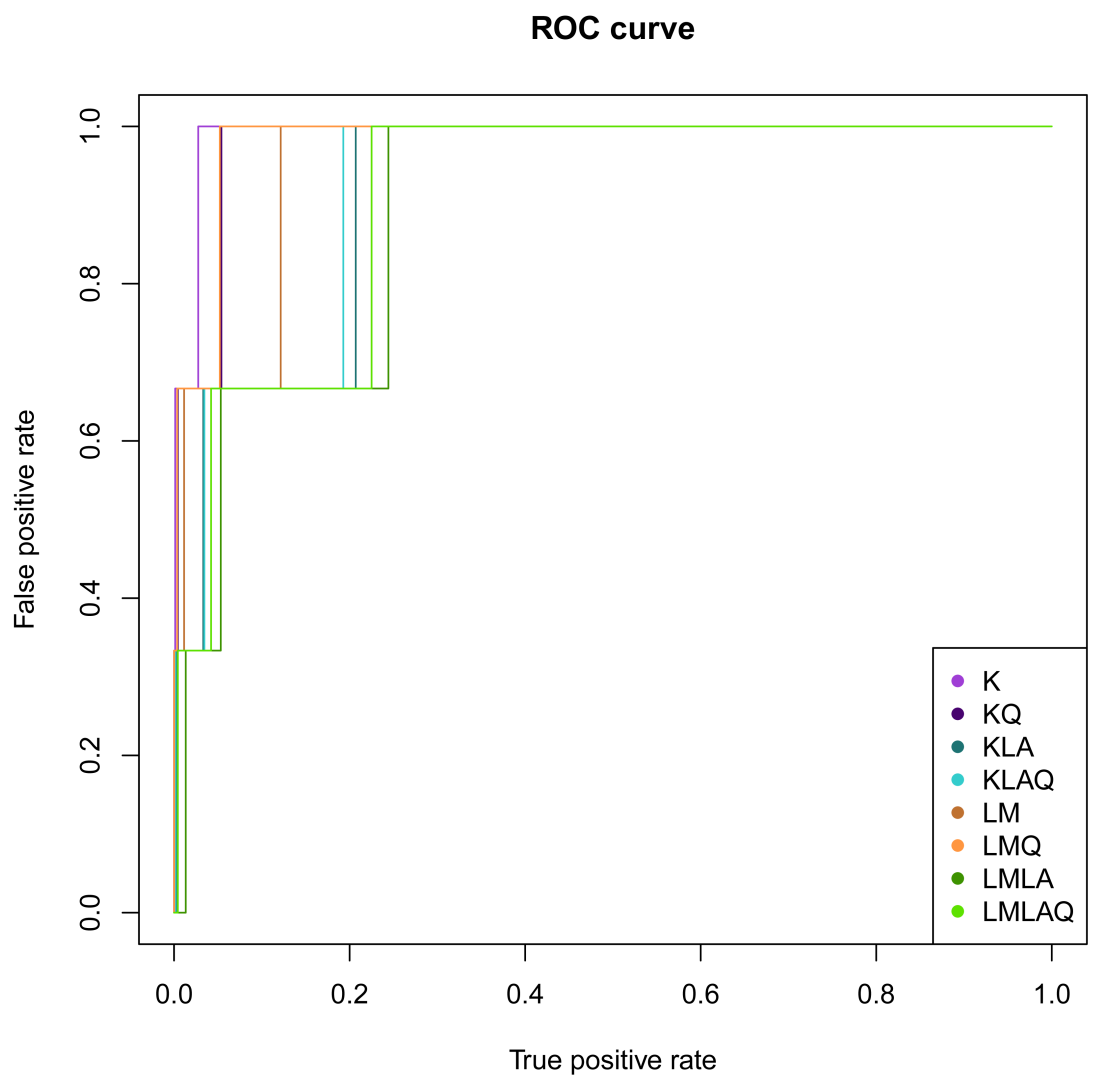

**Figure S5** ROC curve of simulations with 3 causal SNPs each adding phenotypic value 10.

Supplement: supp_112.144790_FigureS5.pdf [file supp_112.144790_FigureS5.pdf]
